## ERRATUM

### Science, Medicine, and the Anesthesiologist: Erratum

In the Science, Medicine, and the Anesthesiologist section starting on page A13 of the July 2017 issue, the summary for “Trial of pregabalin for acute and chronic sciatica” includes a misstatement in the take home message, which reads: “Pregabalin may not be effective in treating sciatic pain and may result in more adverse events, although the study may have been underpowered to detect a difference.” The last part of the sentence, “although the study may have been underpowered to detect a difference” should have been removed.

The Journal apologizes for this error. The online version and PDF of the article have been corrected.

#### Reference

Science, Medicine, and the Anesthesiologist: Trial of pregabalin for acute and chronic sciatica. ANESTHESIOLOGY 2017; 127:A13–A14.

## ERRATUM

### Chad Brummett, M.D., Recipient of the 2017 James C. Cottrell, M.D., Presidential Scholar Award: Erratum

In the article beginning on page 611 in the October 2017 issue, the middle initial of Dr. Cottrell is listed incorrectly in the title and text. The correct name of the award is “2017 James E. Cottrell, M.D., Presidential Scholar Award.”

The Journal apologizes for this error. The online version and PDF of the article have been corrected.

#### Reference

Tremper KK: Chad Brummett, M.D., Recipient of the 2017 James C. Cottrell, M.D., Presidential Scholar Award. ANESTHESIOLOGY 2017; 127:611–3
